# Supplementary material
Source: PubMed Central journal article supplement (PMC8634315)
Supplement: djab116_supplementary_data.pdf [file djab116_supplementary_data.pdf]

## SUPPLEMENTARY MATERIALS

### Supplementary Tables

**Supplementary Table 1. Driver mutations by smoking status**

| Gene        | Never Smoker,<br>No. % (n=105) | Former Smoker,<br>No. % (n=375) | Current Smoker,<br>No. % (n=164) | Overall, No. %<br>(N=644) |
|-------------|--------------------------------|---------------------------------|----------------------------------|---------------------------|
| <i>ALK</i>  | 2 (1.9)                        | 2 (0.5)                         | 1 (0.6)                          | 5 (0.8)                   |
| <i>BRAF</i> | 3 (2.9)                        | 10 (2.7)                        | 9 (5.5)                          | 22 (3.4)                  |
| <i>EGFR</i> | 39 (37.1)                      | 22 (5.9)                        | 4 (2.4)                          | 65 (10.1)                 |
| <i>HER2</i> | 6 (5.7)                        | 6 (1.6)                         | 1 (0.6)                          | 13 (2.0)                  |
| <i>KRAS</i> | 12 (11.4)                      | 154 (41.1)                      | 64 (39.0)                        | 230 (35.7)                |
| <i>MET</i>  | 6 (5.7)                        | 11 (2.9)                        | 1 (0.6)                          | 18 (2.8)                  |
| <i>RET</i>  | 3 (2.9)                        | 4 (1.1)                         | 0 (0)                            | 7 (1.1)                   |
| <i>ROS1</i> | 1 (1.0)                        | 2 (0.5)                         | 1 (0.6)                          | 4 (0.6)                   |
| Wild-Type   | 33 (31.4)                      | 164 (43.7)                      | 83 (50.6)                        | 280 (43.5)                |

**Supplementary Table 2. Best overall response by smoking status**

| Best overall response       | Never Smoker<br>(n=105) |      | Former Smoker<br>(n=375) |      | Current Smoker<br>(n=164) |      |
|-----------------------------|-------------------------|------|--------------------------|------|---------------------------|------|
|                             | n                       | %    | n                        | %    | n                         | %    |
| Complete response           | 2                       | 1.9  | 4                        | 1.1  | 2                         | 1.2  |
| Partial response            | 10                      | 9.5  | 84                       | 22.4 | 44                        | 26.8 |
| Stable disease              | 29                      | 27.6 | 132                      | 35.2 | 54                        | 32.9 |
| Progressive disease         | 64                      | 61.0 | 155                      | 41.3 | 64                        | 39.0 |
| Objective response rate (%) | 11.4                    |      | 23.5                     |      | 28.0                      |      |

**Supplementary Table 3. Association between smoking status and ORR, PFS and OS based on complete dataset and complete dataset using IPW<sup>a</sup>**

| Parameters                                              | Objective Response Rate (n=451) |                |                          |                | Progression-Free Survival (n=451) |                |                          |                | Overall Survival (n=451) |                |                          |                |
|---------------------------------------------------------|---------------------------------|----------------|--------------------------|----------------|-----------------------------------|----------------|--------------------------|----------------|--------------------------|----------------|--------------------------|----------------|
|                                                         | Univariable analysis            |                | Multivariable analysis   |                | Univariable analysis              |                | Multivariable analysis   |                | Univariable analysis     |                | Multivariable analysis   |                |
|                                                         | OR (95% CI) <sup>b</sup>        | P <sup>c</sup> | OR (95% CI) <sup>d</sup> | P <sup>c</sup> | HR (95% CI) <sup>e</sup>          | P <sup>c</sup> | HR (95% CI) <sup>f</sup> | P <sup>c</sup> | HR (95% CI) <sup>e</sup> | P <sup>c</sup> | HR (95% CI) <sup>f</sup> | P <sup>c</sup> |
| Complete dataset                                        |                                 |                |                          |                |                                   |                |                          |                |                          |                |                          |                |
| Former vs Never smoker                                  | 1.80 (0.92, 3.78)               | 0.10           | 1.38 (0.67, 3.05)        | 0.40           | 0.65 (0.50, 0.86)                 | 0.002          | 0.77 (0.58, 1.02)        | 0.07           | 0.77 (0.56, 1.05)        | 0.092          | 0.89 (0.64, 1.22)        | 0.48           |
| Current vs Never smoker                                 | 2.24 (1.07, 4.99)               | 0.04           | 1.92 (0.87, 4.46)        | 0.12           | 0.60 (0.44, 0.83)                 | 0.002          | 0.66 (0.48, 0.91)        | 0.01           | 0.73 (0.51, 1.06)        | 0.10           | 0.82 (0.57, 1.19)        | 0.29           |
| Age                                                     | NA                              | NA             | 1.00 (0.98, 1.02)        | 0.99           | NA                                | NA             | 1.00 (0.99, 1.01)        | 0.48           | NA                       | NA             | 1.00 (1.00, 1.02)        | 0.13           |
| Male vs Female                                          | NA                              | NA             | 0.84 (0.52, 1.34)        | 0.47           | NA                                | NA             | 1.10 (0.90, 1.35)        | 0.34           | NA                       | NA             | 1.13 (0.89, 1.42)        | 0.32           |
| Squamous vs Non-squamous                                | NA                              | NA             | 1.37 (0.64, 2.80)        | 0.39           | NA                                | NA             | 1.09 (0.80, 1.49)        | 0.61           | NA                       | NA             | 1.21 (0.84, 1.72)        | 0.30           |
| ECOG PS ≥2 vs 0-1                                       | NA                              | NA             | 0.36 (0.18, 0.70)        | 0.004          | NA                                | NA             | 1.85 (1.46, 2.34)        | <0.001         | NA                       | NA             | 2.86 (2.19, 3.73)        | <0.001         |
| PD-L1 TPS                                               | NA                              | NA             | 5.06 (2.60, 10.07)       | <0.001         | NA                                | NA             | 0.47 (0.35, 0.64)        | <0.001         | NA                       | NA             | 0.59 (0.41, 0.83)        | 0.003          |
| ≥2 <sup>nd</sup> line vs 1 <sup>st</sup> line treatment | NA                              | NA             | 0.73 (0.44, 1.21)        | 0.22           | NA                                | NA             | 1.08 (0.86, 1.36)        | 0.49           | NA                       | NA             | 1.46 (1.11, 1.91)        | 0.006          |
| Complete Dataset using IPW                              |                                 |                |                          |                |                                   |                |                          |                |                          |                |                          |                |
| Former vs Never smoker                                  | 1.10 (0.99, 1.22)               | 0.082          | 1.06 (0.95, 1.17)        | 0.31           | 0.65 (0.48, 0.87)                 | 0.004          | 0.75 (0.55, 1.02)        | 0.062          | 0.78 (0.56, 1.09)        | 0.15           | 0.87 (0.60, 1.27)        | 0.48           |
| Current vs Never smoker                                 | 1.13 (1.00, 1.27)               | 0.048          | 1.09 (0.97, 1.22)        | 0.15           | 0.61 (0.43, 0.86)                 | 0.004          | 0.65 (0.46, 0.92)        | 0.020          | 0.73 (0.49, 1.08)        | 0.11           | 0.78 (0.52, 1.19)        | 0.26           |
| Age                                                     | NA                              | NA             | 1.00 (1.00, 1.01)        | 0.89           | NA                                | NA             | 0.99 (0.98, 1.01)        | 0.32           | NA                       | NA             | 1.01 (0.99, 1.02)        | 0.35           |
| Male vs Female                                          | NA                              | NA             | 0.97 (0.90, 1.04)        | 0.41           | NA                                | NA             | 1.11 (0.91, 1.37)        | 0.30           | NA                       | NA             | 1.13 (0.88, 1.44)        | 0.35           |
| Squamous vs Non-squamous                                | NA                              | NA             | 1.05 (0.93, 1.18)        | 0.42           | NA                                | NA             | 1.08 (0.84, 1.39)        | 0.53           | NA                       | NA             | 1.15 (0.81, 1.63)        | 0.45           |

|                                                             |    |    |                   |        |    |    |                   |        |    |    |                   |        |
|-------------------------------------------------------------|----|----|-------------------|--------|----|----|-------------------|--------|----|----|-------------------|--------|
| ECOG PS $\geq 2$ vs 0-1                                     | NA | NA | 0.89 (0.81, 0.98) | 0.01   | NA | NA | 1.87 (1.42, 2.47) | <0.001 | NA | NA | 2.91 (2.10, 4.03) | <0.001 |
| PD-L1 TPS                                                   | NA | NA | 1.32 (1.19, 1.47) | <0.001 | NA | NA | 0.48 (0.35, 0.65) | <0.001 | NA | NA | 0.61 (0.43, 0.88) | 0.007  |
| $\geq 2^{\text{nd}}$ line vs 1 <sup>st</sup> line treatment | NA | NA | 0.95 (0.87, 1.04) | 0.24   | NA | NA | 1.08 (0.86, 1.36) | 0.49   | NA | NA | 1.47 (1.12, 1.93) | 0.006  |

<sup>a</sup>Continuous PD-L1 TPS was included in the analysis. ECOG PS = Eastern Cooperative Oncology Group Performance Status; NA = not applicable;

PD-L1 TPS = programmed death ligand-1 tumor proportion score; TMB = tumor mutation burden. Inverse Probability Weighting (IPW).

<sup>b</sup>Unadjusted odds ratio (OR) of objective response.

<sup>c</sup>All P-values were two-sided.

<sup>d</sup>Odds ratio (OR) of objective response adjusted for age, gender, histology, ECOG PS, PD-L1 TPS and lines of treatment.

<sup>e</sup>Unadjusted hazard ratio (HR).

<sup>f</sup>Hazard ratio (HR) adjusted for age, gender, histology, ECOG PS, PD-L1 TPS and lines of treatment.

**Supplementary Table 4. Association between smoking pack-years and ORR, PFS and OS based on complete dataset and complete dataset using IPW<sup>a</sup>**

| Parameters                                              | Objective Response Rate (n=451) |                |                          |                | Progression-Free Survival (n=451) |                |                          |                | Overall Survival (n=451) |                |                          |                |
|---------------------------------------------------------|---------------------------------|----------------|--------------------------|----------------|-----------------------------------|----------------|--------------------------|----------------|--------------------------|----------------|--------------------------|----------------|
|                                                         | Univariable analysis            |                | Multivariable analysis   |                | Univariable analysis              |                | Multivariable analysis   |                | Univariable analysis     |                | Multivariable analysis   |                |
|                                                         | OR (95% CI) <sup>b</sup>        | P <sup>c</sup> | OR (95% CI) <sup>d</sup> | P <sup>c</sup> | HR (95% CI) <sup>e</sup>          | P <sup>c</sup> | HR (95% CI) <sup>f</sup> | P <sup>c</sup> | HR (95% CI) <sup>e</sup> | P <sup>c</sup> | HR (95% CI) <sup>f</sup> | P <sup>c</sup> |
| Complete Dataset                                        |                                 |                |                          |                |                                   |                |                          |                |                          |                |                          |                |
| Doubling Pack-years                                     | 1.13 (1.01, 1.27)               | 0.042          | 1.12 (0.99, 1.28)        | 0.081          | 0.91 (0.87, 0.96)                 | <0.001         | 0.92 (0.88, 0.97)        | 0.001          | 0.95 (0.90, 1.00)        | 0.07           | 0.95 (0.90, 1.01)        | 0.082          |
| Age                                                     | NA                              | NA             | 0.99 (0.97, 1.02)        | 0.65           | NA                                | NA             | 1.00 (0.99, 1.01)        | 0.76           | NA                       | NA             | 1.01 (1.00, 1.02)        | 0.07           |
| Male vs Female                                          | NA                              | NA             | 0.80 (0.49, 1.29)        | 0.36           | NA                                | NA             | 1.15 (0.94, 1.41)        | 0.18           | NA                       | NA             | 1.16 (0.91, 1.46)        | 0.23           |
| Squamous vs Non-squamous                                | NA                              | NA             | 1.37 (0.65, 2.80)        | 0.39           | NA                                | NA             | 1.09 (0.79, 1.50)        | 0.60           | NA                       | NA             | 1.21 (0.85, 1.72)        | 0.30           |
| ECOG PS ≥2 vs 0-1                                       | NA                              | NA             | 0.37 (0.18, 0.70)        | 0.004          | NA                                | NA             | 1.83 (1.44, 2.31)        | <0.001         | NA                       | NA             | 2.85 (2.19, 3.70)        | <0.001         |
| PD-L1 TPS                                               | NA                              | NA             | 5.10 (2.63, 10.13)       | <0.001         | NA                                | NA             | 0.47 (0.35, 0.63)        | <0.001         | NA                       | NA             | 0.59 (0.41, 0.83)        | 0.003          |
| ≥2 <sup>nd</sup> line vs 1 <sup>st</sup> line treatment | NA                              | NA             | 0.73 (0.44, 1.21)        | 0.22           | NA                                | NA             | 1.07 (0.85, 1.35)        | 0.55           | NA                       | NA             | 1.45 (1.10, 1.89)        | 0.007          |
| Complete Dataset using IPW                              |                                 |                |                          |                |                                   |                |                          |                |                          |                |                          |                |
| Doubling Packyears                                      | 1.13 (1.01, 1.27)               | 0.04           | 1.12 (0.99, 1.28)        | 0.08           | 0.91 (0.87, 0.96)                 | <0.001         | 0.92 (0.88, 0.97)        | 0.001          | 0.95 (0.90, 1.00)        | 0.07           | 0.95 (0.90, 1.01)        | 0.08           |
| Age                                                     | NA                              | NA             | 0.99 (0.97, 1.02)        | 0.65           | NA                                | NA             | 1.00 (0.99, 1.01)        | 0.76           | NA                       | NA             | 1.01 (1.00, 1.02)        | 0.07           |
| Male vs Female                                          | NA                              | NA             | 0.80 (0.49, 1.29)        | 0.36           | NA                                | NA             | 1.15 (0.94, 1.41)        | 0.18           | NA                       | NA             | 1.16 (0.91, 1.46)        | 0.23           |
| Squamous vs Non-squamous                                | NA                              | NA             | 1.37 (0.65, 2.80)        | 0.39           | NA                                | NA             | 1.09 (0.79, 1.50)        | 0.60           | NA                       | NA             | 1.21 (0.85, 1.72)        | 0.30           |
| ECOG performance status ≥2 vs 0-1                       | NA                              | NA             | 0.37 (0.18, 0.70)        | 0.004          | NA                                | NA             | 1.83 (1.44, 2.31)        | <0.001         | NA                       | NA             | 2.85 (2.19, 3.70)        | <0.001         |
| PD-L1 TPS                                               | NA                              | NA             | 5.10 (2.63, 10.13)       | <0.001         | NA                                | NA             | 0.47 (0.35, 0.63)        | <0.001         | NA                       | NA             | 0.59 (0.41, 0.83)        | 0.003          |

|                                             |    |    |                   |      |    |    |                   |      |    |    |                   |       |
|---------------------------------------------|----|----|-------------------|------|----|----|-------------------|------|----|----|-------------------|-------|
| ≥2 <sup>nd</sup> line vs 1st line treatment | NA | NA | 0.73 (0.44, 1.21) | 0.22 | NA | NA | 1.07 (0.85, 1.35) | 0.55 | NA | NA | 1.45 (1.10, 1.89) | 0.007 |
|---------------------------------------------|----|----|-------------------|------|----|----|-------------------|------|----|----|-------------------|-------|

<sup>a</sup>Continuous PD-L1 TPS was included in the analysis. ECOG PS = Eastern Cooperative Oncology Group Performance Status; NA = not applicable;

PD-L1 TPS = programmed death ligand-1 tumor proportion score; TMB = tumor mutation burden. Inverse Probability Weighting (IPW).

<sup>b</sup>Unadjusted odds ratio (OR) of objective response.

<sup>c</sup>All P-values were two-sided.

<sup>d</sup>Odds ratio (OR) of objective response adjusted for age, gender, histology, ECOG PS, PD-L1 TPS and lines of treatment.

<sup>e</sup>Unadjusted hazard ratio (HR).

<sup>f</sup>Hazard ratio (HR) adjusted for age, gender, histology, ECOG PS, PD-L1 TPS and lines of treatment.

**Supplementary Table 5. Association between packyears and ORR, PFS and OS in patients lacking oncogenic drivers and those with oncogenic driver mutations**

| Parameters                                  | Objective Response Rate (n=510) |                |                          |                | Progression-Free Survival (n=510) |                |                          |                | Overall Survival (n=510) |                |                          |                |
|---------------------------------------------|---------------------------------|----------------|--------------------------|----------------|-----------------------------------|----------------|--------------------------|----------------|--------------------------|----------------|--------------------------|----------------|
|                                             | Univariable analysis            |                | Multivariable analysis   |                | Univariable analysis              |                | Multivariable analysis   |                | Univariable analysis     |                | Multivariable analysis   |                |
|                                             | OR (95% CI) <sup>a</sup>        | P <sup>b</sup> | OR (95% CI) <sup>c</sup> | P <sup>b</sup> | HR (95% CI) <sup>d</sup>          | P <sup>b</sup> | HR (95% CI) <sup>e</sup> | P <sup>b</sup> | HR (95% CI) <sup>d</sup> | P <sup>b</sup> | HR (95% CI) <sup>e</sup> | P <sup>b</sup> |
| In patients lacking oncogenic drivers       |                                 |                |                          |                |                                   |                |                          |                |                          |                |                          |                |
| Packyears                                   | 1.14 (1.01, 1.30)               | 0.05           | 1.16 (1.01, 1.34)        | 0.04           | 0.96 (0.91, 1.01)                 | 0.09           | 0.96 (0.90, 1.00)        | 0.06           | 0.98 (0.92, 1.04)        | 0.45           | 0.95 (0.89, 1.01)        | 0.11           |
| Age                                         | NA                              | NA             | 1.00 (0.98, 1.02)        | 0.94           | NA                                | NA             | 1.00 (0.99, 1.01)        | 0.84           | NA                       | NA             | 1.00 (0.99, 1.01)        | 0.56           |
| Male vs Female                              | NA                              | NA             | 0.78 (0.50, 1.21)        | 0.27           | NA                                | NA             | 1.21 (1.00, 1.46)        | 0.05           | NA                       | NA             | 1.22 (0.99, 1.53)        | 0.06           |
| Squamous vs Non-squamous                    | NA                              | NA             | 1.17 (0.62, 2.13)        | 0.61           | NA                                | NA             | 1.09 (0.83, 1.43)        | 0.53           | NA                       | NA             | 1.16 (0.87, 1.55)        | 0.32           |
| ECOG PS ≥2 vs 0-1                           | NA                              | NA             | 0.32 (0.16, 0.59)        | <0.01          | NA                                | NA             | 1.96 (1.57, 2.45)        | <0.001         | NA                       | NA             | 2.99 (2.34, 3.82)        | <0.001         |
| ECOG PS Unknown vs 0-1                      | NA                              | NA             | 0.67 (0.03, 5.44)        | 0.73           | NA                                | NA             | 0.81 (0.30, 2.19)        | 0.67           | NA                       | NA             | 0.31 (0.04, 2.19)        | 0.24           |
| PD-L1 TPS ≥50% vs Negative                  | NA                              | NA             | 3.41 (1.52, 8.50)        | 0.005          | NA                                | NA             | 0.56 (0.41, 0.78)        | <0.001         | NA                       | NA             | 0.65 (0.45, 0.94)        | 0.02           |
| PD-L1 TPS 1-49% vs Negative                 | NA                              | NA             | 1.44 (0.61, 3.73)        | 0.42           | NA                                | NA             | 0.89 (0.65, 1.22)        | 0.47           | NA                       | NA             | 1.07 (0.76, 1.52)        | 0.69           |
| PD-L1 TPS Unknown vs Negative               | NA                              | NA             | 2.15 (0.96, 5.32)        | 0.08           | NA                                | NA             | 0.78 (0.58, 1.05)        | 0.11           | NA                       | NA             | 0.98 (0.70, 1.36)        | 0.90           |
| ≥2 <sup>nd</sup> line vs 1st line treatment | NA                              | NA             | 0.91 (0.55, 1.51)        | 0.71           | NA                                | NA             | 1.02 (0.81, 1.28)        | 0.87           | NA                       | NA             | 1.23 (0.94, 1.60)        | 0.13           |
| In patients with oncogenic drivers          |                                 |                |                          |                |                                   |                |                          |                |                          |                |                          |                |
| Packyears                                   | 1.33 (1.08, 1.65)               | 0.008          | 1.35 (1.05, 1.79)        | 0.03           | 0.84 (0.78, 0.92)                 | <0.001         | 0.89 (0.81, 0.96)        | 0.005          | 0.91 (0.84, 1.00)        | 0.04           | 0.97 (0.89, 1.06)        | 0.52           |
| Age                                         | NA                              | NA             | 1.05 (0.99, 1.11)        | 0.11           | NA                                | NA             | 0.97 (0.96, 0.99)        | 0.001          | NA                       | NA             | 0.99 (0.97, 1.01)        | 0.37           |
| Male vs Female                              | NA                              | NA             | 0.50 (0.15, 1.50)        | 0.23           | NA                                | NA             | 0.89 (0.61, 1.31)        | 0.56           | NA                       | NA             | 1.02 (0.67, 1.55)        | 0.93           |

|                                                 |    |    |                   |       |    |    |                   |        |    |    |                   |        |
|-------------------------------------------------|----|----|-------------------|-------|----|----|-------------------|--------|----|----|-------------------|--------|
| Squamous vs Non-squamous                        | NA | NA | 7.11 (0.18, 28.1) | 0.25  | NA | NA | 1.33 (0.40, 4.46) | 0.64   | NA | NA | 2.12 (0.48, 9.40) | 0.32   |
| ECOG PS $\geq 2$ vs 0-1                         | NA | NA | 0.20 (0.01, 1.33) | 0.16  | NA | NA | 2.52 (1.52, 4.17) | <0.001 | NA | NA | 3.43 (2.01, 5.83) | <0.001 |
| ECOG PS Unknown vs 0-1                          | NA | NA | NA                | >0.99 | NA | NA | 0.49 (0.07, 3.62) | 0.48   | NA | NA | 0.64 (0.09, 4.74) | 0.66   |
| PD-L1 TPS $\geq 50\%$ vs Negative               | NA | NA | NA                | >0.99 | NA | NA | 0.29 (0.15, 0.57) | <0.001 | NA | NA | 0.48 (0.23, 1.00) | 0.05   |
| PD-L1 TPS 1-49% vs Negative                     | NA | NA | NA                | >0.99 | NA | NA | 0.58 (0.30, 1.14) | 0.11   | NA | NA | 0.56 (0.28, 1.12) | 0.10   |
| PD-L1 TPS Unknown vs Negative                   | NA | NA | NA                | >0.99 | NA | NA | 0.66 (0.33, 1.29) | 0.22   | NA | NA | 0.85 (0.42, 1.69) | 0.64   |
| $\geq 2^{\text{nd}}$ line vs 1st line treatment | NA | NA | 0.99 (0.29, 3.60) | 0.93  | NA | NA | 1.14 (0.66, 1.96) | 0.63   | NA | NA | 1.70 (0.88, 3.26) | 0.11   |

<sup>a</sup>Unadjusted odds ratio (OR) of objective response. ECOG PS = Eastern Cooperative Oncology Group Performance Status; NA = not applicable;

PD-L1 TPS = programmed death ligand-1 tumor proportion score; TMB = tumor mutation burden. Inverse Probability Weighting (IPW).

<sup>b</sup> All P-values were two-sided.

<sup>c</sup>Odds ratio (OR) of objective response adjusted for age, gender, histology, ECOG PS, PD-L1 TPS and lines of treatment.

<sup>d</sup>Unadjusted hazard ratio (HR).

<sup>e</sup>Hazard ratio (HR) adjusted for age, gender, histology, ECOG PS, PD-L1 TPS and lines of treatment.



**Supplementary Table 6. Effect of smoking pack-years on ORR, OS, and PFS in stratified analysis by PD-L1 TPS of  $\geq 50\%$ <sup>a</sup>**

| Clinical outcomes     | PD-L1 TPS <50% (n=230) |                        |                   | PD-L1 TPS $\geq 50\%$ (n=221) |                        |                   |
|-----------------------|------------------------|------------------------|-------------------|-------------------------------|------------------------|-------------------|
|                       | 1 <sup>st</sup> line   | > 2 <sup>nd</sup> line | Overall           | 1 <sup>st</sup> line          | > 2 <sup>nd</sup> line | Overall           |
| ORR                   |                        |                        |                   |                               |                        |                   |
| Univariable           |                        |                        |                   |                               |                        |                   |
| OR (95% CI)           | 0.99 (0.68, 1.55)      | 1.11 (0.91, 1.40)      | 1.09 (0.91, 1.32) | 1.10 (0.89, 1.38)             | 1.12 (0.90, 1.43)      | 1.14 (0.98, 1.33) |
| <i>P</i> <sup>b</sup> | 0.95                   | 0.34                   | 0.39              | 0.39                          | 0.32                   | 0.10              |
| Multivariable         |                        |                        |                   |                               |                        |                   |
| OR (95% CI)           | 1.09 (0.69, 1.86)      | 1.13 (0.91, 1.43)      | 1.13 (0.93, 1.39) | 1.20 (0.95, 1.53)             | 1.18 (0.93, 1.53)      | 1.18 (1.01, 1.41) |
| <i>P</i> <sup>b</sup> | 0.72                   | 0.29                   | 0.25              | 0.13                          | 0.19                   | 0.05              |
| OS                    |                        |                        |                   |                               |                        |                   |
| Univariable           |                        |                        |                   |                               |                        |                   |
| HR (95% CI)           | 0.98 (0.83, 1.17)      | 0.97 (0.90, 1.05)      | 0.97 (0.90, 1.04) | 1.00 (0.85, 1.17)             | 0.91 (0.80, 1.03)      | 0.93 (0.85, 1.02) |
| <i>P</i> <sup>b</sup> | 0.86                   | 0.47                   | 0.35              | 0.99                          | 0.15                   | 0.14              |
| Multivariable         |                        |                        |                   |                               |                        |                   |
| HR (95% CI)           | 0.95 (0.79, 1.15)      | 1.00 (0.92, 1.08)      | 0.98 (0.92, 1.06) | 0.90 (0.76, 1.05)             | 0.83 (0.72, 0.95)      | 0.87 (0.79, 0.96) |
| <i>P</i> <sup>b</sup> | 0.61                   | 0.98                   | 0.64              | 0.19                          | 0.007                  | 0.007             |
| PFS                   |                        |                        |                   |                               |                        |                   |
| Univariable           |                        |                        |                   |                               |                        |                   |
| HR (95% CI)           | 0.93 (0.81, 1.07)      | 0.93 (0.87, 1.00)      | 0.93 (0.88, 0.99) | 0.93 (0.82, 1.04)             | 0.89 (0.80, 1.00)      | 0.90 (0.84, 0.98) |
| <i>P</i> <sup>b</sup> | 0.31                   | 0.04                   | 0.02              | 0.20                          | 0.05                   | 0.012             |
| Multivariable         |                        |                        |                   |                               |                        |                   |
| HR (95% CI)           | 0.89 (0.77, 1.04)      | 0.95 (0.89, 1.02)      | 0.94 (0.89, 1.01) | 0.89 (0.79, 1.00)             | 0.85 (0.76, 0.96)      | 0.88 (0.81, 0.95) |
| <i>P</i> <sup>b</sup> | 0.15                   | 0.21                   | 0.09              | 0.06                          | 0.008                  | 0.002             |

<sup>a</sup>Multivariable analyses adjusted for age, gender, histology, ECOG PS, PD-L1 TPS and lines of treatment. ORR= objective response rate; PFS = progression-free survival; OS = overall survival; HR = hazard ratio; PD-L1 TPS = programmed death ligand-1 tumor proportional score; 1-line: first line of treatment, >2<sup>nd</sup> line: second lines of treatment and beyond

<sup>b</sup>All P-values were two-sided.

**Supplementary Table 7. Effect of smoking pack-years on ORR, PFS and OS by different PD-L1 TPS cut-offs**

| PD-L1<br>TPS<br>cutoff | ORR               |                       |                   |                       | PFS               |                       |                   |                       | OS                |                       |                   |                       |
|------------------------|-------------------|-----------------------|-------------------|-----------------------|-------------------|-----------------------|-------------------|-----------------------|-------------------|-----------------------|-------------------|-----------------------|
|                        | Below Cut-point   |                       | Above Cut-point   |                       | Below Cut-point   |                       | Above Cut-point   |                       | Below Cut-point   |                       | Above Cut-point   |                       |
|                        | OR (95% CI)       | <i>P</i> <sup>a</sup> | OR (95% CI)       | <i>P</i> <sup>a</sup> | HR (95% CI)       | <i>P</i> <sup>a</sup> |
| 50%                    | 1.13 (0.93, 1.40) | 0.24                  | 1.18 (1.01, 1.41) | 0.047                 | 0.95 (0.89, 1.01) | 0.09                  | 0.88 (0.81, 0.95) | 0.002                 | 0.98 (0.92, 1.06) | 0.64                  | 0.87 (0.79, 0.96) | 0.007                 |
| 55%                    | 1.18 (0.98, 1.45) | 0.09                  | 1.18 (0.98, 1.45) | 0.14                  | 0.92 (0.87, 0.98) | 0.01                  | 0.89 (0.82, 0.98) | 0.015                 | 0.95 (0.89, 1.02) | 0.18                  | 0.89 (0.80, 0.99) | 0.04                  |
| 60%                    | 1.18 (0.98, 1.45) | 0.10                  | 1.15 (0.97, 1.38) | 0.12                  | 0.92 (0.87, 0.98) | 0.01                  | 0.90 (0.82, 0.98) | 0.01                  | 0.95 (0.89, 1.02) | 0.17                  | 0.89 (0.80, 1.00) | 0.04                  |
| 70%                    | 1.15 (0.98, 1.39) | 0.11                  | 1.14 (0.95, 1.39) | 0.17                  | 0.91 (0.86, 0.97) | 0.004                 | 0.90 (0.82, 0.99) | 0.03                  | 0.95 (0.89, 1.01) | 0.12                  | 0.89 (0.79, 1.00) | 0.05                  |

<sup>a</sup> All P-values were two-sided. ORR= objective response rate; PFS = progression-free survival; OS = overall survival; PD-L1 TPS = programmed death ligand-1 tumor proportional score; HR=hazard ratio.

**Supplementary Table 8. Model performance based on complete dataset using IPW<sup>a</sup>**

| Model (n=451)                     | ORR<br>AUC (95% CI) | PFS (6-months)<br>AUC (95% CI) | OS (24-months)<br>AUC (95% CI) |
|-----------------------------------|---------------------|--------------------------------|--------------------------------|
| Baseline Model                    | 0.64 (0.53, 0.72)   | 0.62 (0.56, 0.67)              | 0.72 (0.65, 0.77)              |
| Baseline + Pack-years             | 0.67 (0.54, 0.75)   | 0.65 (0.60, 0.70)              | 0.73 (0.66, 0.77)              |
| Baseline + PD-L1 TPS + Pack-years | 0.71 (0.62, 0.77)   | 0.66 (0.61, 0.71)              | 0.73 (0.67, 0.78)              |
| Baseline + PD-L1 TPS + TMB        | 0.71 (0.63, 0.77)   | 0.68 (0.64, 0.72)              | 0.74 (0.68, 0.78)              |

<sup>a</sup>Predictive logistic and Cox proportional hazards models were constructed and validated in the complete dataset (n=451) with inverse probability weighting (IPW) using 10-fold cross-validation. Receiver operating characteristic's (ROC) area under the curve (AUC) illustrates the model performance on objective response rate (ORR), time-dependent AUC on progression-free survival (PFS) at 6 months and time-dependent AUC on overall survival (OS) at 24 months using different predictors. Baseline model incorporated age at treatment initiation, gender, histology, Eastern Cooperative Oncology Group Performance Status ECOG PS, and lines of treatment and they were consistently incorporated in all of the models. 95% CI was calculated from 500 bootstrapping.

**Supplementary Table 9. Indirect effect of smoking status and smoking pack-years through TMB on ORR, PFS and OS<sup>a</sup>**

| Smoking variables       | ORR                  |                    |                   |               | PFS                  |                    |                   |               | OS                   |                    |                   |              |
|-------------------------|----------------------|--------------------|-------------------|---------------|----------------------|--------------------|-------------------|---------------|----------------------|--------------------|-------------------|--------------|
|                         | Indirect Effect (OR) | Direct Effect (OR) | Total Effect (OR) | Prop          | Indirect Effect (mo) | Direct Effect (mo) | Total Effect (mo) | Prop          | Indirect Effect (mo) | Direct Effect (mo) | Total Effect (mo) | Prop         |
| Smoking status          |                      |                    |                   |               |                      |                    |                   |               |                      |                    |                   |              |
| Former vs Never Smoker  | 1.02 (<2e-16)        | 1.07 (0.10)        | 1.09 (0.04)       | 0.26 (0.04)   | 0.89 (0.004)         | 1.90 (0.12)        | 2.79 (0.02)       | 0.32 (0.03)   | 1.93 (0.002)         | 2.87 (0.50)        | 4.80 (0.23)       | 0.40 (0.23)  |
| Current vs Never Smoker | 1.05 (<2e-16)        | 1.10 (0.06)        | 1.16 (0.02)       | 0.34 (0.02)   | 2.04 (<2e-16)        | 2.92 (0.11)        | 4.96 (0.002)      | 0.41 (0.002)  | 4.00 (<2e-16)        | 2.71 (0.57)        | 6.71 (0.16)       | 0.60 (0.16)  |
| Smoking Pack-year       |                      |                    |                   |               |                      |                    |                   |               |                      |                    |                   |              |
| 10 PY vs Never Smoker   | 1.03 (<0.001)        | 1.05 (<0.001)      | 1.08 (<0.001)     | 0.33 (<0.001) | 0.94 (<0.001)        | 1.76 (0.016)       | 2.70 (<0.001)     | 0.35 (<0.001) | 1.97 (<0.001)        | 3.63 (0.068)       | 5.59 (0.004)      | 0.35 (0.004) |
| 20 PY vs Never Smoker   | 1.04 (<0.001)        | 1.07 (0.04)        | 1.11 (0.04)       | 0.33 (<0.001) | 1.24 (<0.001)        | 2.32 (0.008)       | 3.55 (<0.001)     | 0.35 (<0.001) | 2.57 (<0.001)        | 4.73 (0.108)       | 7.29 (0.004)      | 0.35 (0.004) |
| 30 PY vs Never Smoker   | 1.04 (<0.001)        | 1.08 (0.08)        | 1.13 (<0.001)     | 0.33 (<0.001) | 1.47 (<0.001)        | 2.74 (0.016)       | 4.20 (<0.001)     | 0.35 (<0.001) | 3.01 (<0.001)        | 5.55 (0.104)       | 8.56 (0.012)      | 0.35 (0.012) |
| 20 PY vs 10 PY          | 1.01 (<0.001)        | 1.02 (<0.001)      | 1.03 (<0.001)     | 0.33 (<0.001) | 0.32 (<0.001)        | 0.60 (0.004)       | 0.93 (<0.001)     | 0.35 (<0.001) | 0.62 (<0.001)        | 1.15 (0.112)       | 1.77 (0.004)      | 0.35 (0.004) |
| 30 PY vs 20 PY          | 1.00 (<0.001)        | 1.01 (<0.001)      | 1.02 (<0.001)     | 0.33 (<0.001) | 0.21 (<0.001)        | 0.40 (0.012)       | 0.72 (<0.001)     | 0.35 (<0.001) | 0.40 (<0.001)        | 0.74 (0.148)       | 1.14 (0.008)      | 0.35 (0.008) |

<sup>a</sup>Mediated effect through TMB by smoking status. Mediated effect on ORR is in the unit of Odds Ratio (OR) while progression-free survival (PFS) and overall survival (OS) is in the unit of months. Prop: proportion of the mediated effect through smoking variables; PY; smoking pack-years.

**Supplementary Table 10. Association between smoking status and TMB<sup>a</sup>**

| Covariates                                             | Univariable Analysis (N=644) |                       | Multivariable Analysis (N=644) |                       |
|--------------------------------------------------------|------------------------------|-----------------------|--------------------------------|-----------------------|
|                                                        | Effect (95% CI)              | <i>P</i> <sup>b</sup> | Effect (95% CI)                | <i>P</i> <sup>b</sup> |
| Former vs never smoker                                 | 1.36 (1.15, 1.61)            | <0.001                | 1.35 (1.13, 1.60)              | <0.001                |
| Current vs never smoker                                | 1.80 (1.49, 2.18)            | <0.001                | 1.80 (1.49, 2.18)              | <0.001                |
| Age                                                    | NA                           | NA                    | 1.00 (1.00, 1.01)              | 0.59                  |
| Male vs Female                                         | NA                           | NA                    | 1.08 (0.96, 1.22)              | 0.21                  |
| Squamous Cell Carcinoma vs Non-Squamous Cell Carcinoma | NA                           | NA                    | 0.95 (0.78, 1.14)              | 0.56                  |

<sup>a</sup>Effect here means the difference of tumor mutation burden (TMB) comparing former smokers to never smokers and current smokers to never smokers.

<sup>b</sup>All P-values were two-sided.

**Supplementary Table 11. Model Performance using time-dependent AUC based on the complete dataset**

| Model (n=451)                           | ORR<br>AUC (95% CI) | PFS (6-months)<br>AUC (95% CI) | OS (24-months)<br>AUC (95% CI) |
|-----------------------------------------|---------------------|--------------------------------|--------------------------------|
| Complete dataset <sup>a</sup>           |                     |                                |                                |
| Baseline Model                          | 0.64 (0.53, 0.72)   | 0.62 (0.56, 0.67)              | 0.72 (0.65, 0.76)              |
| Baseline + PD-L1 TPS                    | 0.69 (0.59, 0.75)   | 0.64 (0.59, 0.68)              | 0.73 (0.67, 0.77)              |
| Baseline + Pack-years                   | 0.67 (0.54, 0.75)   | 0.65 (0.60, 0.70)              | 0.73 (0.66, 0.77)              |
| Baseline + TMB                          | 0.66 (0.55, 0.73)   | 0.67 (0.62, 0.72)              | 0.73 (0.67, 0.78)              |
| Baseline + PD-L1 TPS + Pack-years       | 0.71 (0.61, 0.77)   | 0.66 (0.61, 0.71)              | 0.73 (0.67, 0.78)              |
| Baseline + PD-L1 TPS + TMB              | 0.71 (0.63, 0.77)   | 0.68 (0.64, 0.72)              | 0.74 (0.68, 0.78)              |
| Baseline + PD-L1 TPS + TMB+ Pack-years  | 0.71 (0.63, 0.78)   | 0.69 (0.64, 0.73)              | 0.74 (0.68, 0.79)              |
| Complete dataset with IPW <sup>b</sup>  |                     |                                |                                |
| Baseline Model                          | 0.64 (0.53, 0.72)   | 0.62 (0.56, 0.67)              | 0.72 (0.65, 0.77)              |
| Baseline + PD-L1 TPS                    | 0.69 (0.59, 0.75)   | 0.64 (0.59, 0.68)              | 0.73 (0.67, 0.77)              |
| Baseline + Pack-years                   | 0.67 (0.54, 0.75)   | 0.65 (0.60, 0.70)              | 0.73 (0.66, 0.77)              |
| Baseline + TMB                          | 0.66 (0.55, 0.73)   | 0.68 (0.62, 0.72)              | 0.73 (0.67, 0.78)              |
| Baseline + PD-L1 TPS + Pack-years       | 0.71 (0.62, 0.77)   | 0.66 (0.61, 0.71)              | 0.73 (0.67, 0.78)              |
| Baseline + PD-L1 TPS + TMB              | 0.71 (0.63, 0.77)   | 0.68 (0.64, 0.72)              | 0.74 (0.68, 0.78)              |
| Baseline + PD-L1 TPS + TMB + Pack-years | 0.71 (0.63, 0.78)   | 0.69 (0.64, 0.73)              | 0.74 (0.68, 0.79)              |

<sup>a</sup>Predictive logistic and Cox proportional hazards models were constructed and validated the patients with complete information (n=451) using 10-fold cross-validation. Receiver operating characteristic's (ROC) area under the curve (AUC) illustrates the model performance on objective response rate (ORR), time-dependent AUC on progression-free survival (PFS) at 6 months and time-dependent AUC on overall survival (OS) at 24 months using different predictors. Baseline model incorporated age at treatment initiation, gender, histology, Eastern Cooperative Oncology Group Performance Status (ECOG PS), and lines of treatment and they were consistently incorporated in all of the models. 95% CI was calculated from 500 bootstrapping.

<sup>b</sup>Predictive logistic and Cox proportional hazards models were constructed and validated in the complete dataset (n=451) with inverse probability weighting (IPW) using 10-fold cross-validation. Receiver operating characteristic's (ROC) area under curve (AUC) illustrating the model performance on objective response rate (ORR), time-dependent AUC on progression-free survival (PFS) at 6 months and time-dependent AUC on overall survival (OS) at 24 months using different predictors. Baseline model incorporated age at treatment initiation, gender, histology, Eastern Cooperative Oncology Group Performance Status (ECOG PS), and lines of treatment and they were consistently incorporated in all of the models. 95% CI was calculated from 500 bootstrapping.

**Supplementary Table 12. Model Performance using C-index based on the complete dataset and the complete dataset with IPW**

| Model (n=451)                                | ORR<br>C-index (95% CI) | PFS<br>C-index (95% CI) | OS<br>C-index (95% CI) |
|----------------------------------------------|-------------------------|-------------------------|------------------------|
| <b>Complete dataset<sup>a</sup></b>          |                         |                         |                        |
| Baseline Model                               | 0.64 (0.53, 0.72)       | 0.61 (0.53, 0.67)       | 0.55 (0.37, 0.74)      |
| Baseline + PD-L1 TPS                         | 0.69 (0.59, 0.75)       | 0.62 (0.54, 0.67)       | 0.63 (0.45, 0.76)      |
| Baseline + Pack-years                        | 0.67 (0.54, 0.75)       | 0.62 (0.54, 0.68)       | 0.58 (0.40, 0.73)      |
| Baseline + TMB                               | 0.66 (0.55, 0.73)       | 0.63 (0.56, 0.70)       | 0.56 (0.39, 0.72)      |
| Baseline + PD-L1 TPS + Pack-years            | 0.71 (0.61, 0.77)       | 0.63 (0.56, 0.68)       | 0.64 (0.43, 0.78)      |
| Baseline + PD-L1 TPS + TMB                   | 0.71 (0.63, 0.77)       | 0.64 (0.58, 0.70)       | 0.64 (0.43, 0.78)      |
| Baseline + PD-L1 TPS + TMB+ Pack-years       | 0.71 (0.63, 0.78)       | 0.65 (0.58, 0.70)       | 0.64 (0.45, 0.79)      |
| <b>Complete dataset with IPW<sup>b</sup></b> |                         |                         |                        |
| Baseline Model                               | 0.64 (0.53, 0.72)       | 0.61 (0.53, 0.67)       | 0.55 (0.37, 0.74)      |
| Baseline + PD-L1 TPS                         | 0.69 (0.59, 0.75)       | 0.62 (0.54, 0.67)       | 0.63 (0.45, 0.76)      |
| Baseline + Pack-years                        | 0.67 (0.54, 0.75)       | 0.62 (0.54, 0.68)       | 0.58 (0.40, 0.73)      |
| Baseline + TMB                               | 0.66 (0.55, 0.73)       | 0.63 (0.56, 0.69)       | 0.56 (0.39, 0.72)      |
| Baseline + PD-L1 TPS + Pack-years            | 0.71 (0.62, 0.77)       | 0.63 (0.56, 0.68)       | 0.64 (0.43, 0.78)      |
| Baseline + PD-L1 TPS + TMB                   | 0.71 (0.63, 0.77)       | 0.64 (0.57, 0.70)       | 0.64 (0.43, 0.78)      |
| Baseline + PD-L1 TPS + TMB + Pack-years      | 0.71 (0.63, 0.78)       | 0.65 (0.58, 0.70)       | 0.64 (0.45, 0.79)      |

<sup>a</sup>Predictive logistic and Cox proportional hazards models were constructed and validated in the complete dataset (n=451) using 10-fold cross-validation. C-index illustrates the model performance on objective response rate (ORR), progression-free survival (PFS) and overall survival (OS) using different predictors. Baseline model incorporated age at treatment initiation, gender, histology, Eastern Cooperative Oncology Group Performance Status (ECOG PS), and lines of treatment and they were consistently incorporated in all of the models. 95% CI was calculated from 500 bootstrapping.

<sup>b</sup>Predictive logistic and Cox proportional hazards models were constructed and validated in the complete dataset (n=451) with inverse probability weighting (IPW) using 10-fold cross-validation. C-index illustrates the model performance on objective response rate (ORR), progression-free survival (PFS) and overall survival (OS) using different predictors. Baseline model incorporated age at treatment initiation, gender, histology, Eastern Cooperative Oncology Group Performance Status (ECOG PS), and lines of treatment and they were consistently incorporated in all of the models. 95% CI was calculated from 500 bootstrapping.

**Supplementary Table 13. Baseline clinicopathological characteristics**

| Characteristics                      | PD-L1 TPS missing status |                     |                       | Lines of ICI Monotherapy     |                               |                       | Oncogenic driver mutation status |                           |                       |
|--------------------------------------|--------------------------|---------------------|-----------------------|------------------------------|-------------------------------|-----------------------|----------------------------------|---------------------------|-----------------------|
|                                      | PD-L1 unknown (n=191)    | PD-L1 known (n=453) | <i>P</i> <sup>a</sup> | 1 <sup>st</sup> line (n=216) | ≥2 <sup>nd</sup> line (n=428) | <i>P</i> <sup>a</sup> | With oncogenic (n=134)           | Without oncogenic (n=510) | <i>P</i> <sup>a</sup> |
| Median age [range], y                | 64 [32.0, 91.0]          | 67 [25.0, 92.0]     | 0.001                 | 69.0 [45.0, 92.0]            | 65.0 [25.0, 91.0]             | <0.001                | 64.0 [25.0, 92.0]                | 66.5 [32.0, 91.0]         | 0.07                  |
| Gender, No. (%)                      |                          |                     | 0.022                 |                              |                               |                       |                                  |                           |                       |
| Female                               | 91 (47.6)                | 263 (58.1)          |                       | 117 (54.2)                   | 237 (55.4)                    | 0.84                  | 75 (56.0)                        | 279 (54.7)                | 0.87                  |
| Male                                 | 100 (52.4)               | 190 (41.9)          |                       | 99 (45.8)                    | 191 (44.6)                    |                       | 59 (44.0)                        | 231 (45.3)                |                       |
| Histology, No. (%)                   |                          |                     | 0.22                  |                              |                               |                       |                                  |                           |                       |
| Non-squamous Cell Carcinoma          | 164 (85.9)               | 406 (89.6)          |                       | 188 (87.0)                   | 382 (89.3)                    | 0.48                  | 131 (97.8)                       | 439 (86.1)                | <0.001                |
| Squamous Cell Carcinoma              | 27 (14.1)                | 47 (10.4)           |                       | 28 (13.0)                    | 46 (10.7)                     |                       | 3 (2.2)                          | 71 (13.9)                 |                       |
| Smoking status, No. (%)              |                          |                     |                       |                              |                               |                       |                                  |                           |                       |
| Never Smoker                         | 32 (16.8)                | 73 (16.1)           | 0.39                  | 18 (8.3)                     | 87 (20.3)                     | <0.001                | 60 (44.8)                        | 45 (8.8)                  | <0.001                |
| Former Smoker                        | 104 (54.5)               | 271 (59.8)          |                       | 139 (64.4)                   | 236 (55.1)                    |                       | 57 (42.5)                        | 318 (62.4)                |                       |
| Current Smoker                       | 55 (28.8)                | 109 (24.1)          |                       | 59 (27.3)                    | 105 (24.5)                    |                       | 17 (12.7)                        | 147 (28.8)                |                       |
| ECOG PS, No. (%)                     |                          |                     |                       |                              |                               |                       |                                  |                           |                       |
| 0-1                                  | 151 (79.1)               | 351 (77.7)          | 0.59                  | 173 (80.1)                   | 330 (77.1)                    | 0.61                  | 108 (80.6)                       | 395 (77.5)                | 0.50                  |
| ≥2                                   | 37 (19.4)                | 99 (21.9)           |                       | 43 (19.9)                    | 93 (21.7)                     |                       | 25 (18.7)                        | 111 (21.8)                |                       |
| Unknown                              | 3 (1.6)                  | 2 (0.4)             |                       | 0 (0)                        | 5 (1.2)                       |                       | 1 (0.7)                          | 4 (0.8)                   |                       |
| Lines of therapy, No. (%)            |                          |                     |                       |                              |                               |                       |                                  |                           |                       |
| 1 <sup>st</sup> line                 | 20 (10.5)                | 196 (43.3)          | <0.001                | --                           | --                            | --                    | 32 (23.9)                        | 184 (36.1)                | 0.01                  |
| ≥2 <sup>nd</sup> line                | 171 (89.5)               | 257 (56.7)          |                       | --                           | --                            |                       | 102 (76.1)                       | 326 (63.9)                |                       |
| Pack-years, median (IQR) or [range]  | 29.5 (37.0)              | 25 (31.0)           | 0.85                  | 25.0 [0, 120]                | 25.0 [0, 120]                 | 0.02                  | 3.00 [0, 120]                    | 30.0 [0, 120]             | <0.001                |
| Unknown                              | --                       | --                  |                       | 0 (0)                        | 1 (0.2)                       |                       | 1 (0.7)                          | 0 (0)                     |                       |
| Median TMB (mut/Mb) (IQR) or [range] | 9.68 (7.5)               | 9.89 (6.8)          | 0.86                  | 10.6 [0, 41.8]               | 9.78 [0, 61.7]                | 0.11                  | 9.12 [0, 41.8]                   | 10.6 [0, 61.7]            | 0.005                 |
| PD-L1 TPS, No. (%)                   |                          |                     |                       |                              |                               |                       |                                  |                           |                       |
| Negative                             | --                       | --                  | --                    | 14 (6.5)                     | 66 (15.4)                     | <0.001                | 13 (9.7)                         | 67 (13.1)                 | 0.39                  |
| 1-49%                                | --                       | --                  |                       | 37 (17.1)                    | 113 (26.4)                    |                       | 36 (26.9)                        | 114 (22.4)                |                       |
| ≥50%                                 | --                       | --                  |                       | 145 (67.1)                   | 78 (18.2)                     |                       | 47 (35.1)                        | 176 (34.5)                |                       |
| Unknown                              | --                       | --                  |                       | 20 (9.3)                     | 171 (40.0)                    |                       | 38 (28.4)                        | 153 (30.0)                |                       |

<sup>a</sup>All P-values were two-sided. ECOG PS = Eastern Cooperative Oncology Group Performance Status; PD-L1 TPS = programmed death ligand-1 tumor proportion score; TMB = tumor mutation burden.



**Supplementary Table 14. Univariate analysis of related clinical variables**

| Parameters                                              | Objective Response Rate |                       | Progression-free Survival |                       | Overall Survival  |                       |
|---------------------------------------------------------|-------------------------|-----------------------|---------------------------|-----------------------|-------------------|-----------------------|
|                                                         | OR (95% CI)             | <i>P</i> <sup>a</sup> | HR (95% CI)               | <i>P</i> <sup>a</sup> | HR (95% CI)       | <i>P</i> <sup>a</sup> |
| Former vs Never smoker                                  | 1.13 (1.03, 1.23)       | 0.009                 | 0.66 (0.53, 0.83)         | <0.001                | 0.77 (0.60, 0.99) | 0.04                  |
| Current vs Never smoker                                 | 1.18 (1.07, 1.31)       | 0.001                 | 0.59 (0.45, 0.76)         | <0.001                | 0.74 (0.56, 0.99) | 0.04                  |
| Doubling Pack-years                                     | 1.03 (1.01, 1.04)       | <0.001                | 0.91 (0.88, 0.95)         | <0.001                | 0.95 (0.91, 0.99) | 0.02                  |
| Age                                                     | 1.00 (0.99, 1.00)       | 0.23                  | 1.00 (0.99, 1.01)         | 0.42                  | 1.00 (0.99, 1.01) | 0.54                  |
| Male vs Female                                          | 0.96 (0.90, 1.03)       | 0.28                  | 1.13 (0.96, 1.33)         | 0.15                  | 1.19 (0.99, 1.44) | 0.058                 |
| Squamous vs Non-squamous                                | 1.03 (0.93, 1.15)       | 0.51                  | 1.08 (0.84, 1.39)         | 0.57                  | 1.17 (0.89, 1.54) | 0.27                  |
| ECOG PS ≥2 vs 0-1                                       | 0.85 (0.79, 0.92)       | <0.001                | 1.96 (1.61, 2.38)         | <0.001                | 2.88 (2.32, 3.57) | <0.001                |
| ECOG PS unknown vs 0-1                                  | 0.94 (0.65, 1.36)       | 0.75                  | 0.73 (0.30, 1.76)         | 0.48                  | 0.42 (0.10, 1.68) | 0.22                  |
| PD-L1 TPS ≥50% vs Negative                              | 1.27 (1.15, 1.41)       | <0.001                | 0.49 (0.37, 0.64)         | <0.001                | 0.53 (0.39, 0.72) | <0.001                |
| PD-L1 TPS 1-49% vs Negative                             | 1.05 (0.94, 1.18)       | 0.35                  | 0.85 (0.65, 1.12)         | 0.26                  | 0.96 (0.71, 1.31) | 0.81                  |
| Unknown vs Negative                                     | 1.11 (1.00, 1.24)       | 0.06                  | 0.74 (0.57, 0.97)         | 0.03                  | 0.92 (0.70, 1.23) | 0.59                  |
| ≥2 <sup>nd</sup> line vs 1 <sup>st</sup> line treatment | 0.89 (0.84, 0.96)       | <0.001                | 1.34 (1.12, 1.60)         | 0.002                 | 1.56 (1.27, 1.93) | <0.001                |

<sup>a</sup> All P-values were two-sided. ECOG PS = Eastern Cooperative Oncology Group Performance Status; PD-

L1 TPS = programmed death ligand-1 tumor proportion score; TMB = tumor mutation burden.

# Supplementary Figures

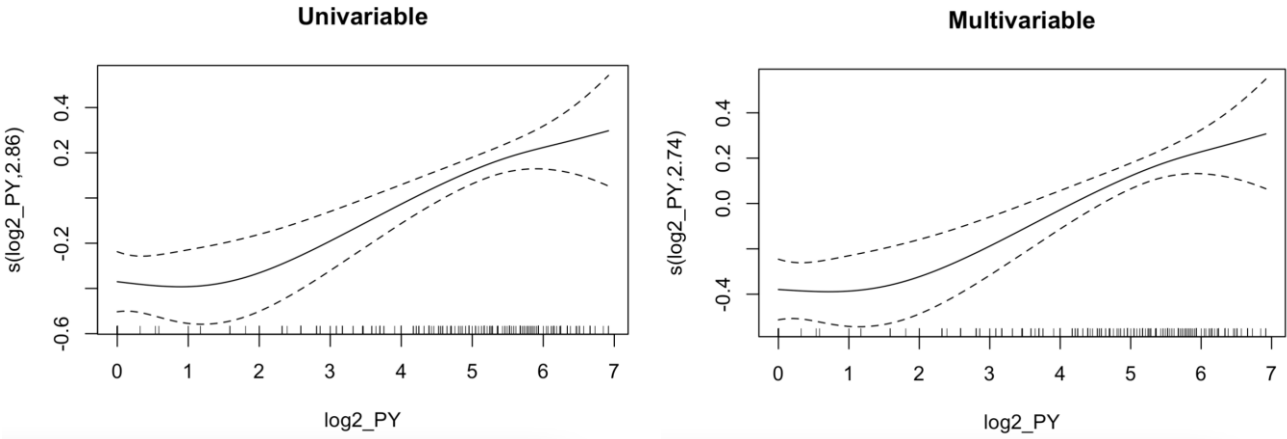

**Supplementary Figure 1. Contribution of smoking pack-years to TMB**

TMB = tumor mutation burden, PY = smoking pack-years

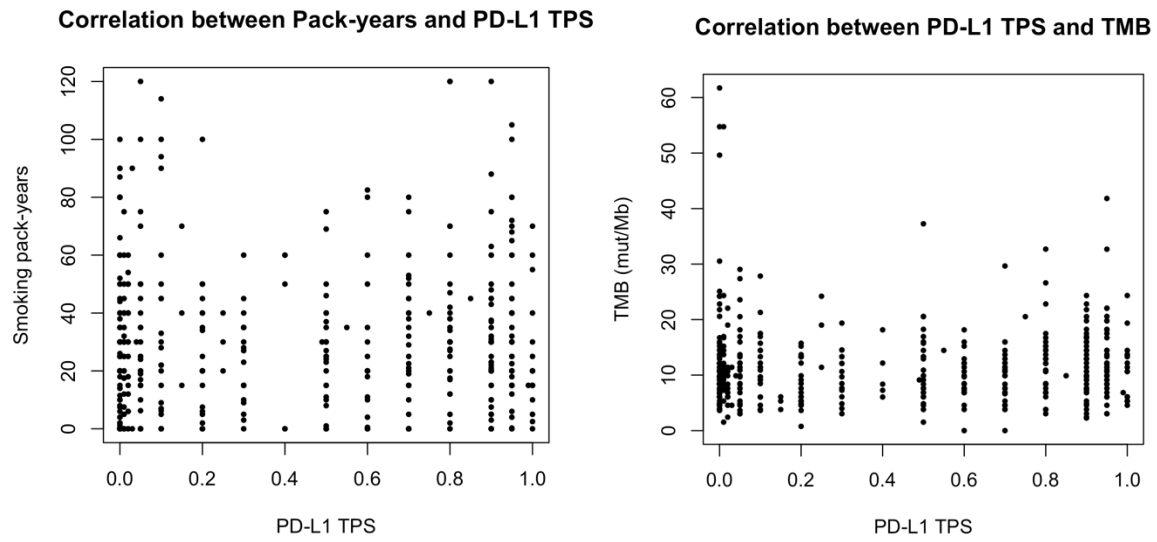

**Supplementary Figure 2. Correlation between PD-L1 TPS and smoking pack-years and TMB.**

PD-L1 TPS = Programmed death ligand-1 tumor proportion score; TMB = tumor mutation burden

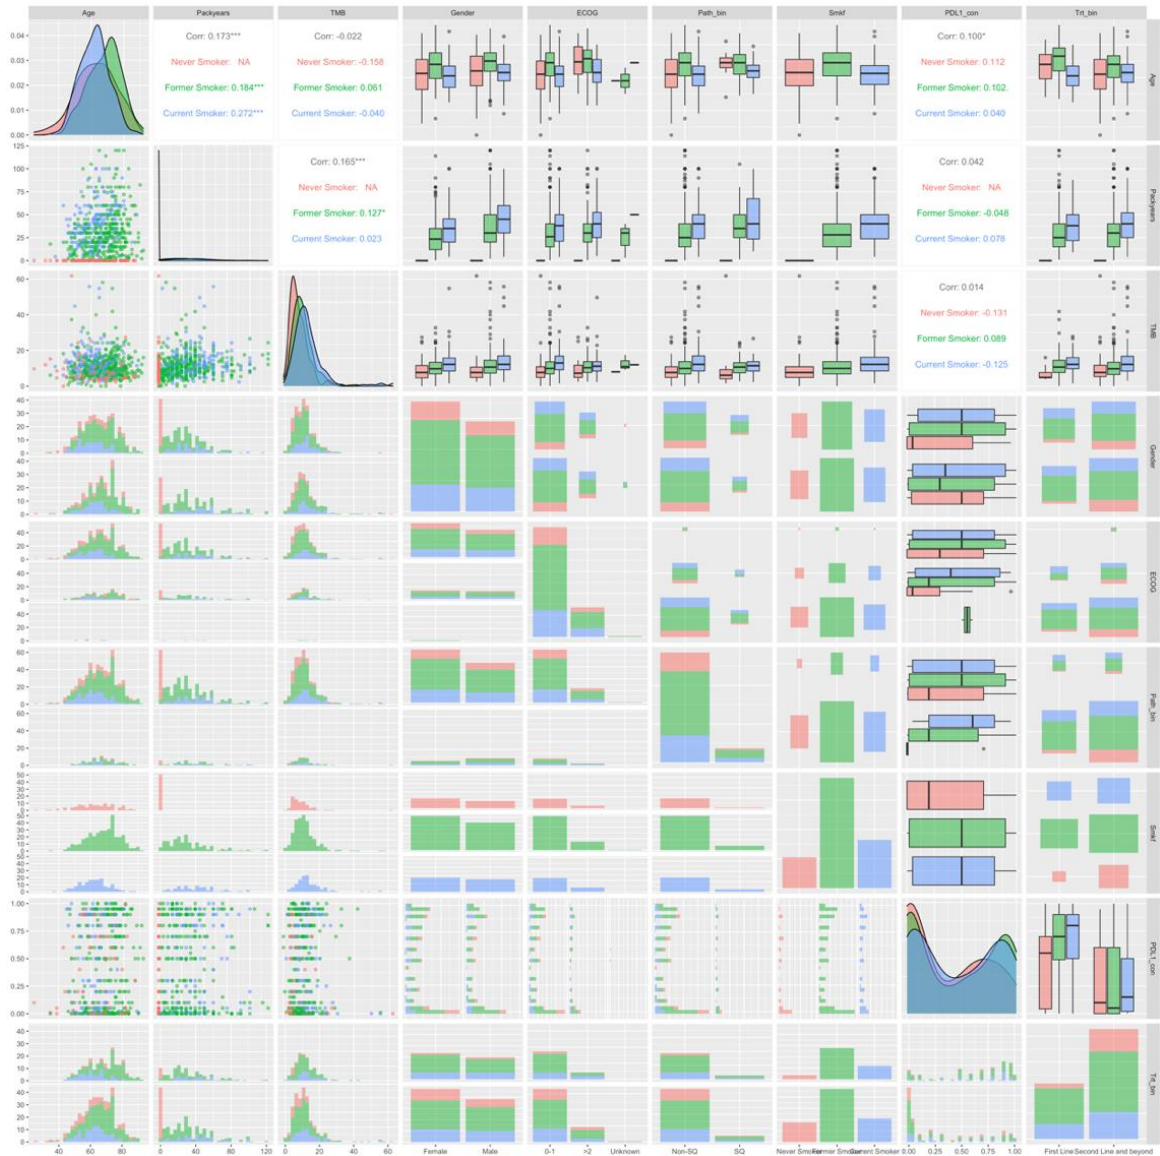

### Supplementary Figure 3. Correlation matrix between independent variables

Gender: Female, Male; Eastern Cooperative Oncology Group Performance Status (ECOG PS): 0-1,  $\geq 2$ , Unknown; Path\_bin: Non-SQ (Non-squamous Cell Carcinoma), SQ (Squamous Cell Carcinoma); Smkf: Never smoker, Former smoker and Current smoker; Trt\_bin: First-Line, Second-line treatment setting and beyond. Color represents the smoking status with red: never smokers, green: former smokers and blue: current smokers.
